# Supplementary material for: Nucleophilic fluorination using imidazolium based ionic liquid bearing tert-alcohol moiety
Source: Royal Society of Chemistry journal article supplement (doi:10.1039/c5nj00481k), 2015-01-01

## **Nucleophilic Fluorination using Imidazolium based Ionic liquid**

### **bearing *tert*-Alcohol moiety**

**Sandip S. Shinde,\* Sunil N. Patil, Amruta Ghathge, and Pradeep Kumar**

*<sup>a</sup>Organic Chemistry Division, National Chemical Laboratory (CSIR-NCL), Dr. Homi*

*Bhabha Road, Pashan, Pune 411008, India. E-mail: [ss.shinde@ncl.res.in](mailto:ss.shinde@ncl.res.in);*

Supporting Information

**Solubility of [mim-<sup>+</sup>OH][OMs] (blue arrow) in various solvents**

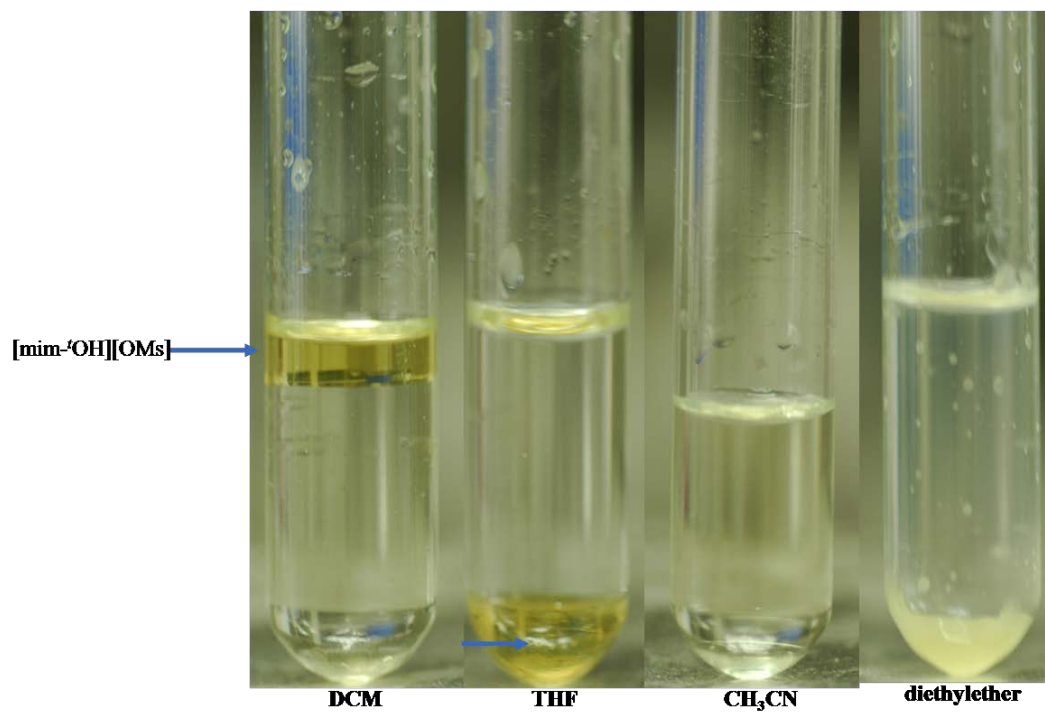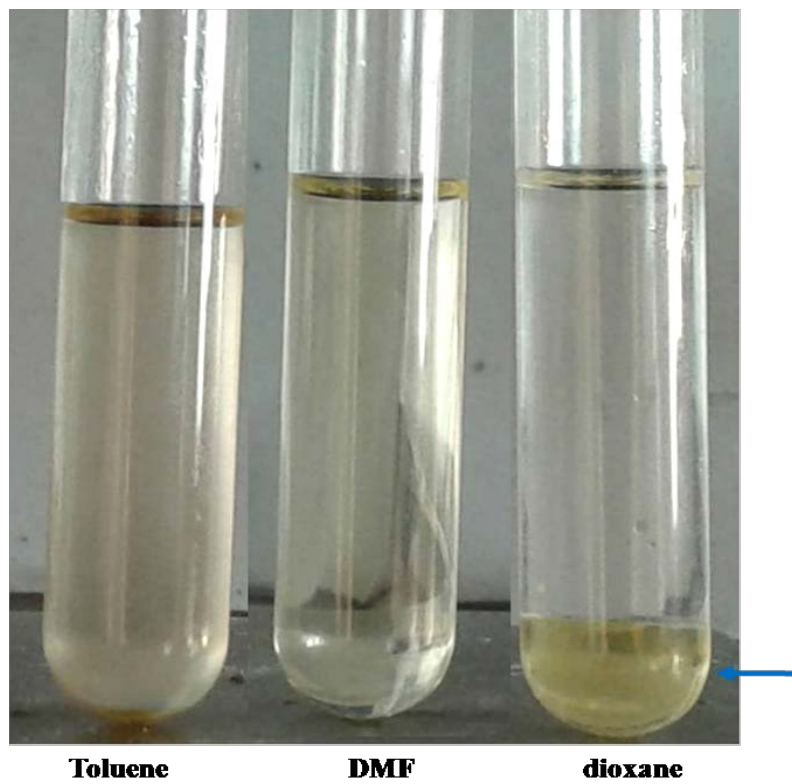

1-(2-Hydroxy-2-methylpropyl)-3-methylimidazolium mesylate [mim-<sup>t</sup>OH][OMs]<sup>1</sup>H NMR (400 MHz, CDCl<sub>3</sub>)

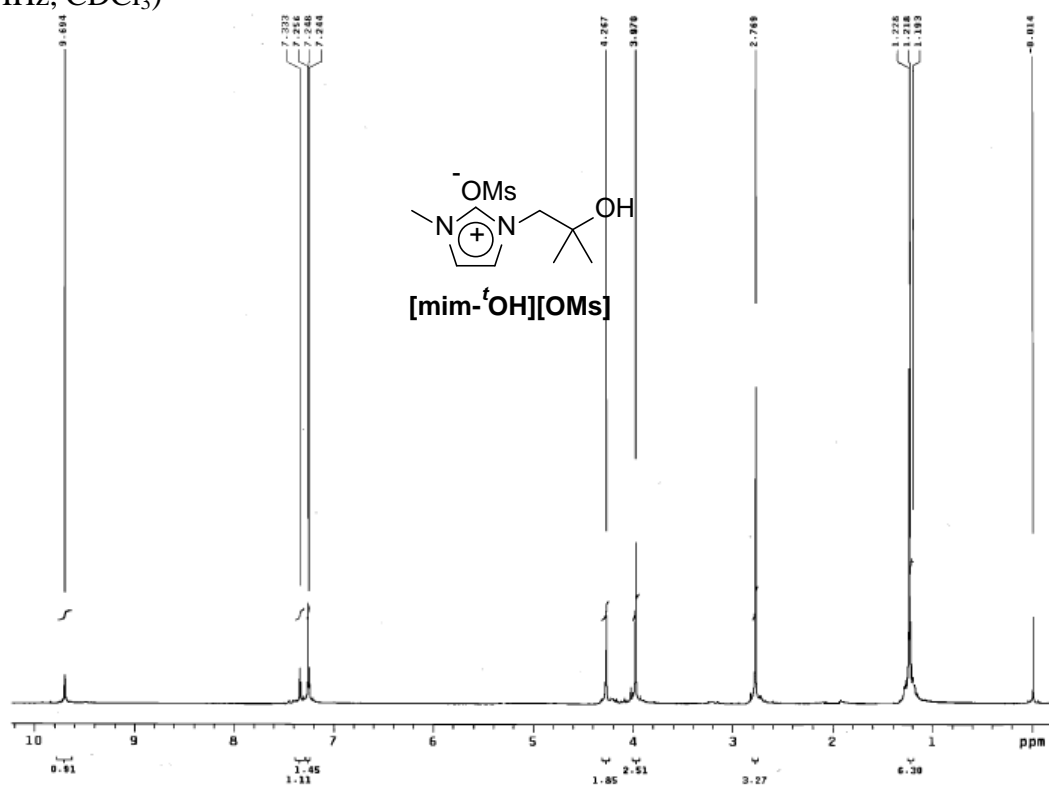

<sup>13</sup>C NMR (100 MHz, CDCl<sub>3</sub>)

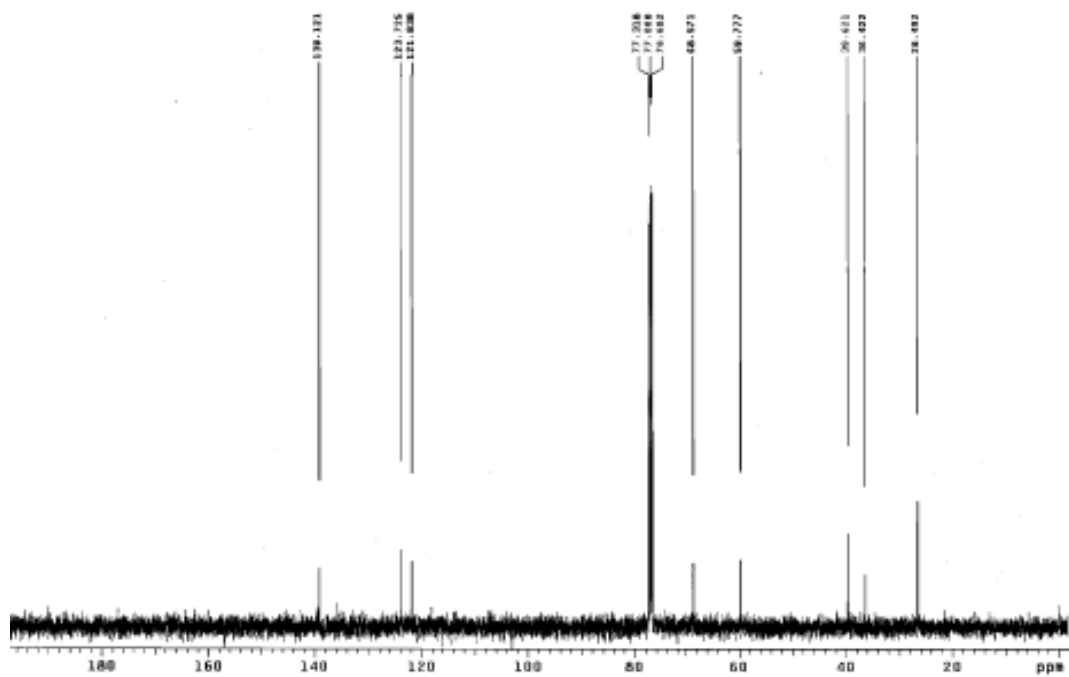

2. 2-(3-Methanesulfonyloxypropoxy)naphthalene. <sup>1</sup>H NMR (500 MHz, CDCl<sub>3</sub>)

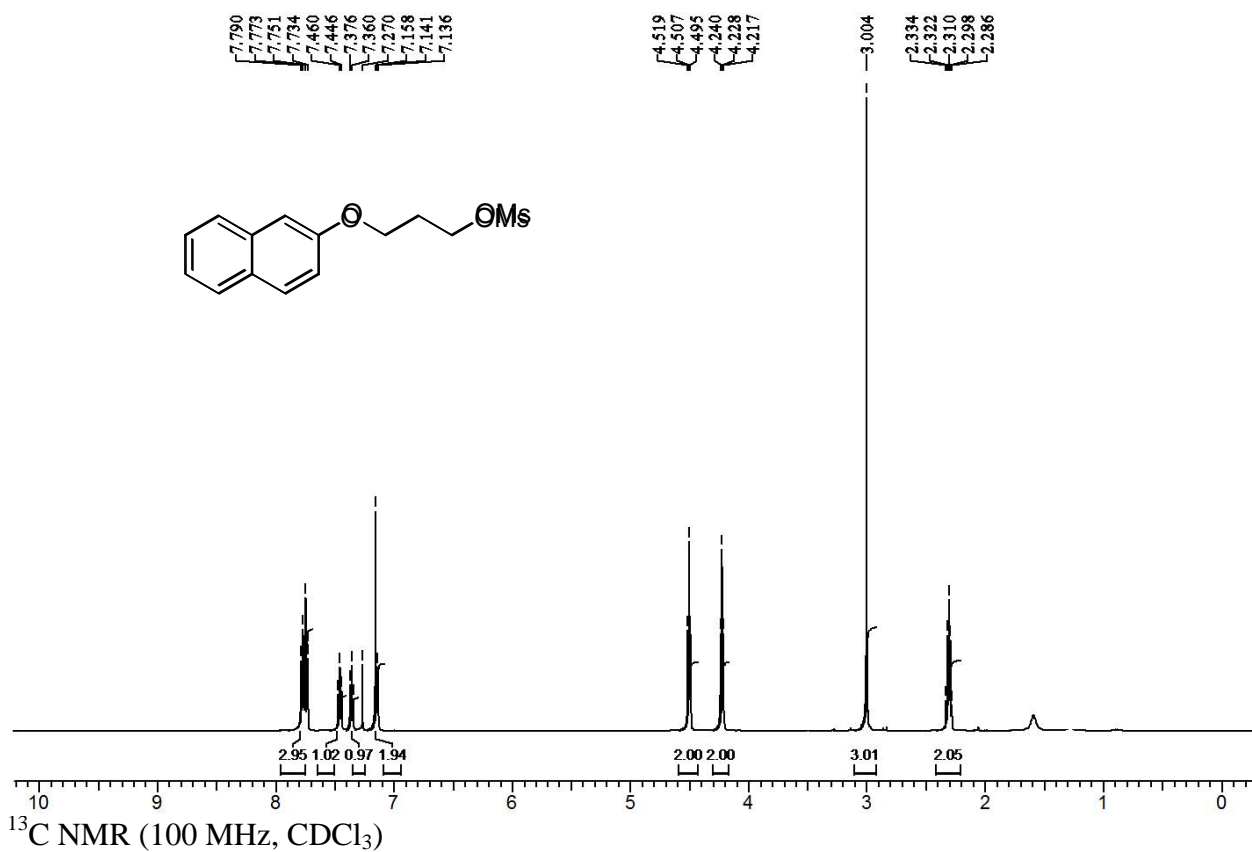

<sup>13</sup>C NMR (100 MHz, CDCl<sub>3</sub>)

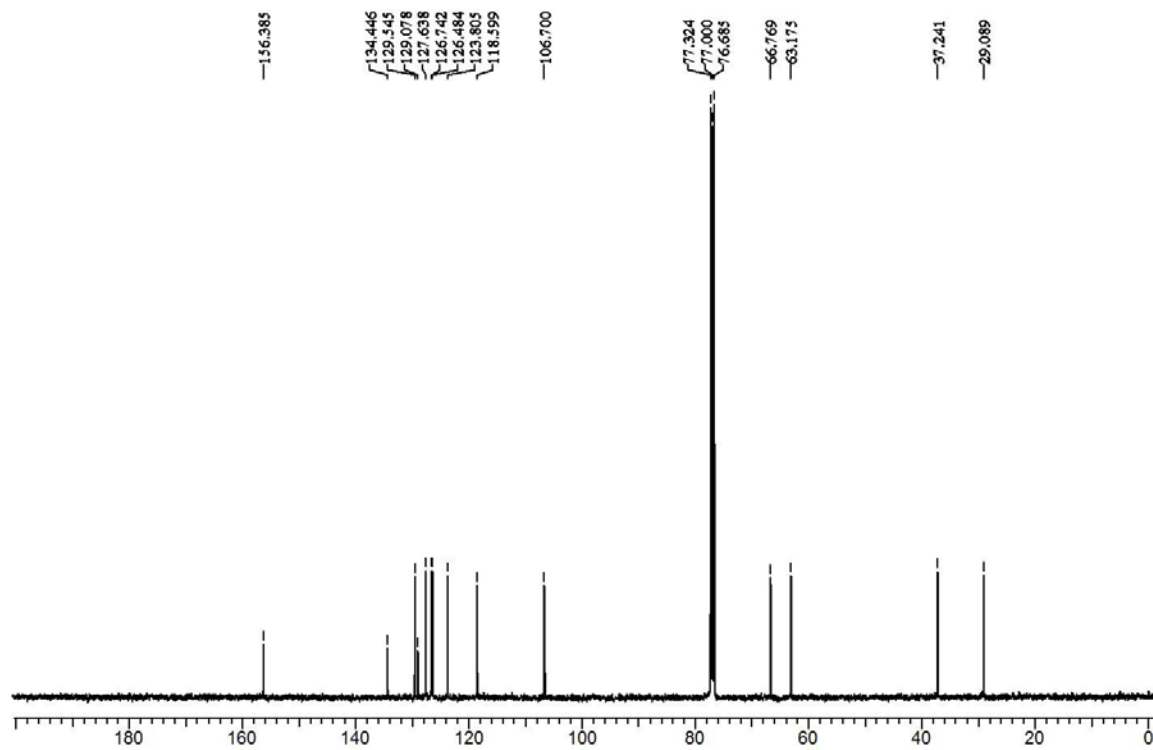

3. 2-(3-fluoropropoxy)naphthalene. <sup>1</sup>H NMR (200 MHz, CDCl<sub>3</sub>)

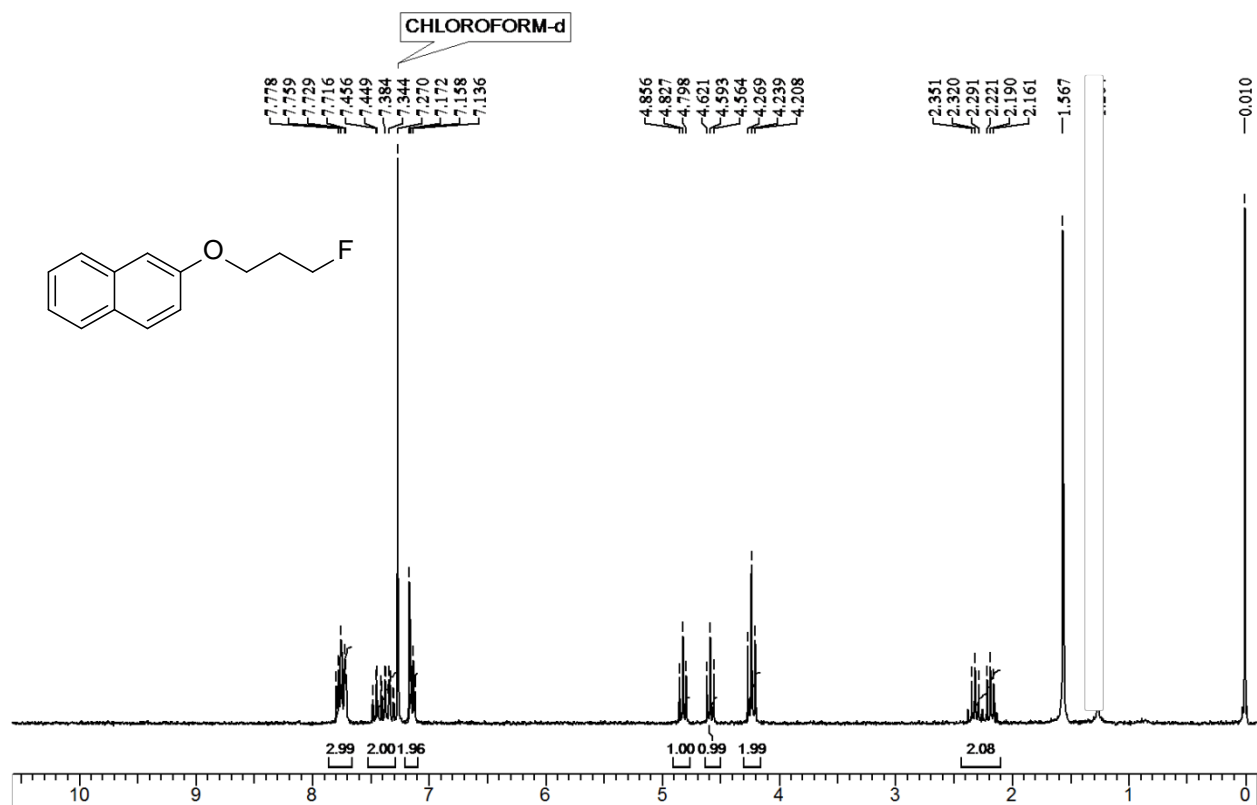

$^{13}\text{C}$  NMR (100 MHz,  $\text{CDCl}_3$ )

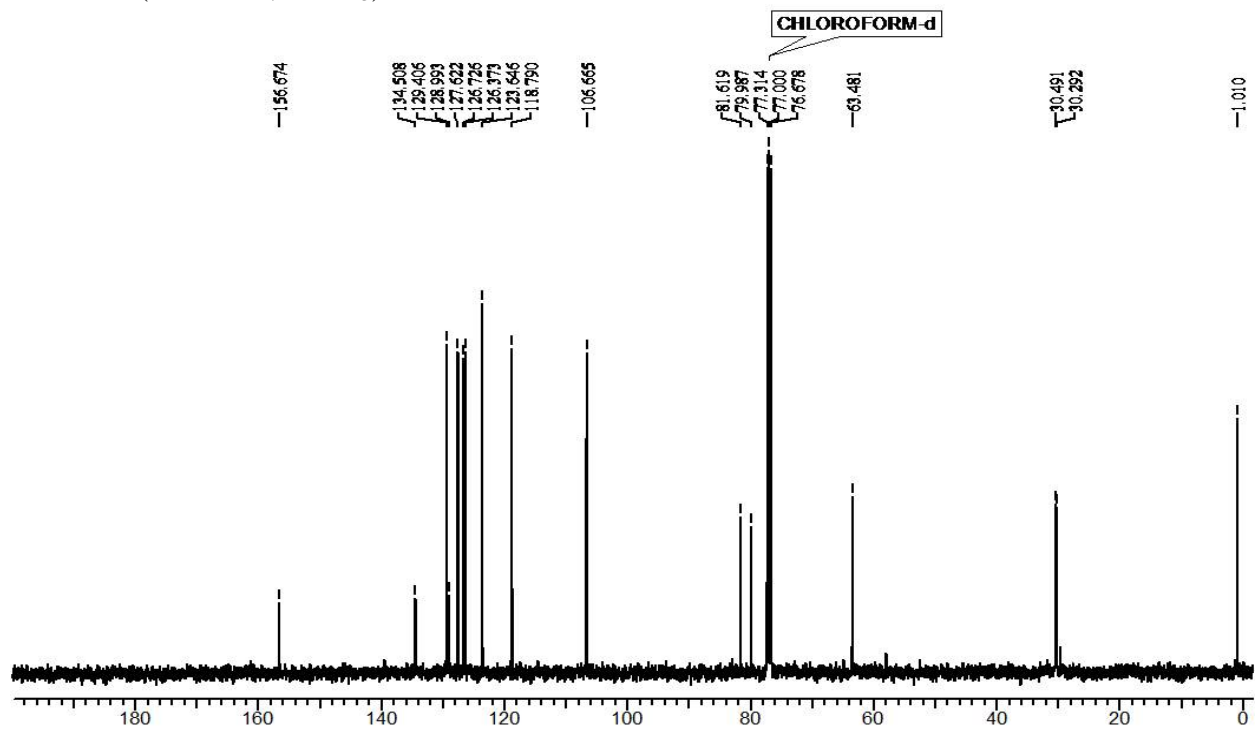

3-(3-Fluoropropoxy)estrone.  $^1\text{H}$  NMR (400 MHz,  $\text{CDCl}_3$ )

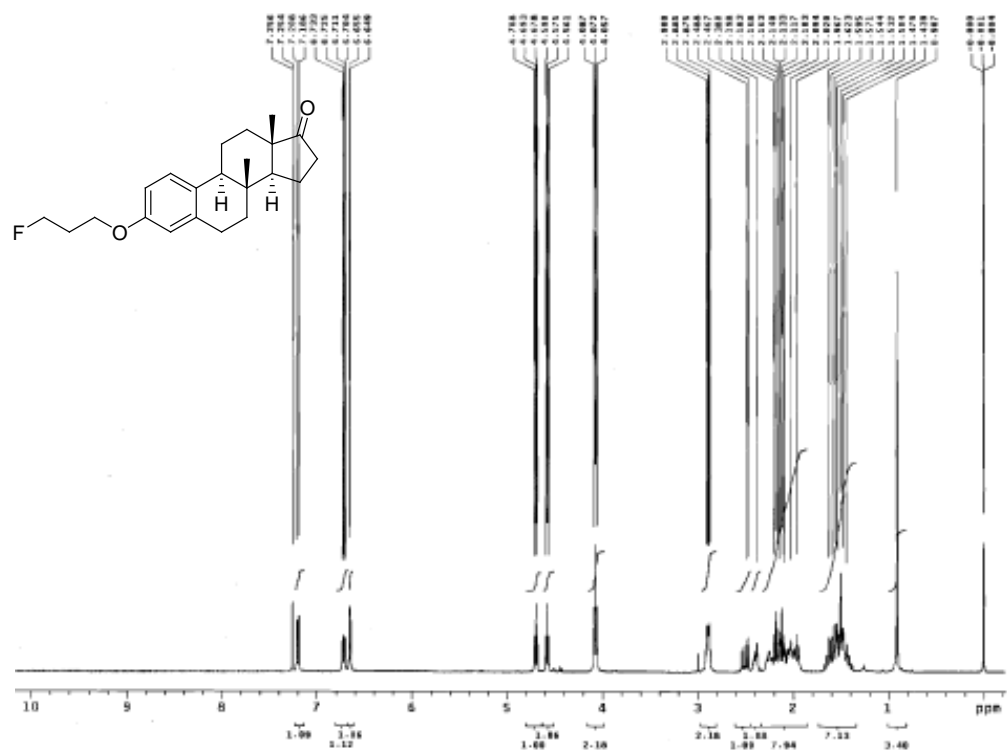

$^{13}\text{C}$  NMR (100 MHz,  $\text{CDCl}_3$ )

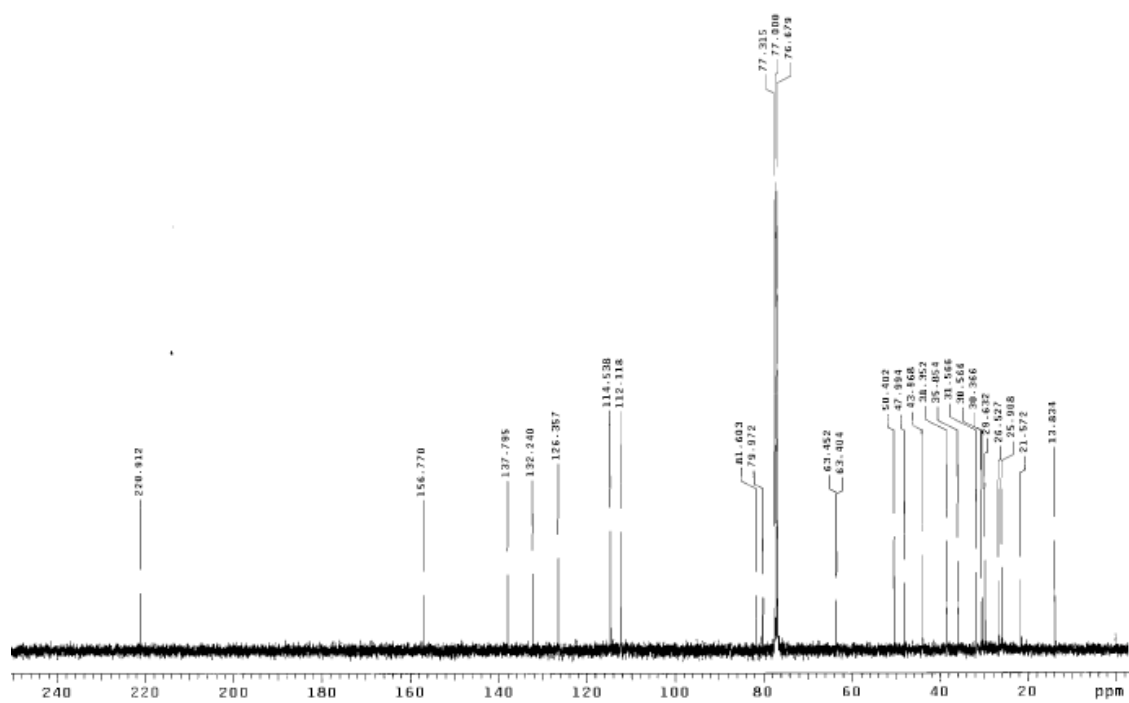

2-(2-Fluoropropoxy)naphthalene.  $^1\text{H}$  NMR (400 MHz,  $\text{CDCl}_3$ )

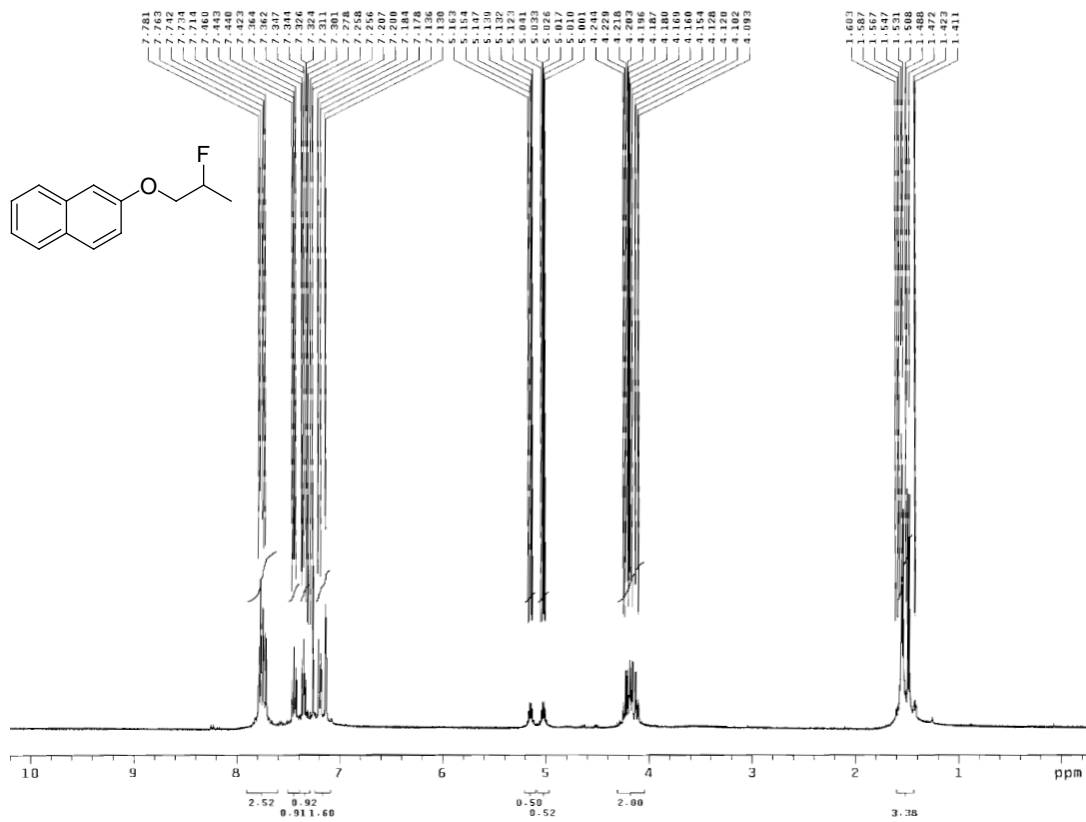

$^{13}\text{C}$  NMR (100 MHz,  $\text{CDCl}_3$ )

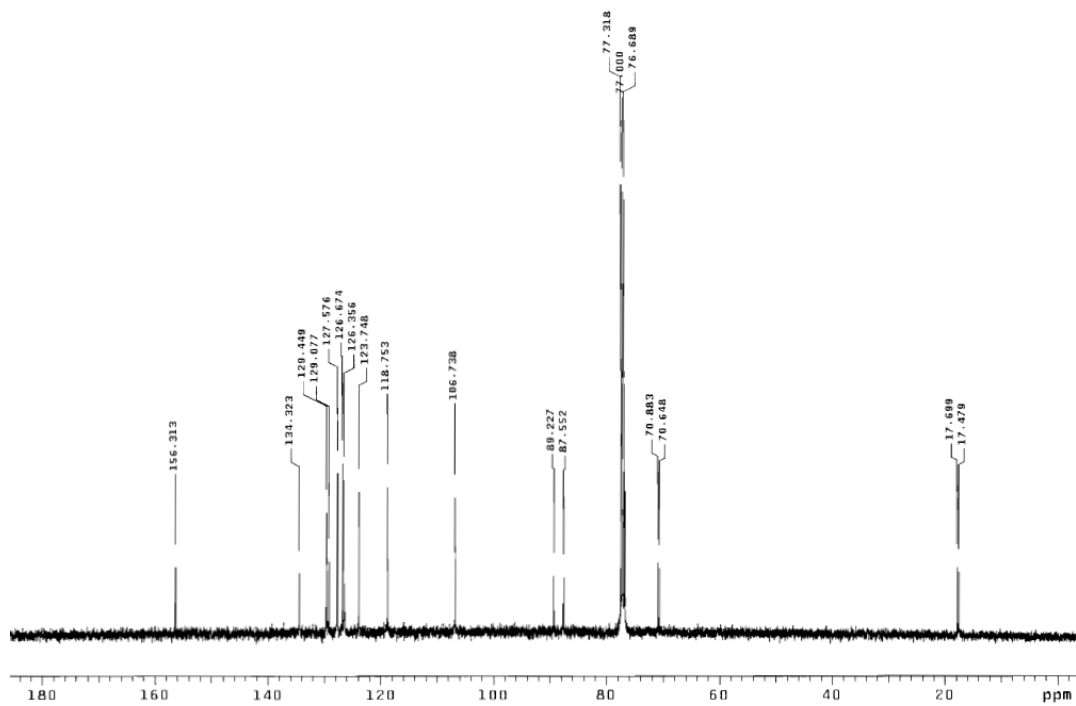

3-fluorobutyl benzene.  $^1\text{H}$  NMR (400 MHz,  $\text{CDCl}_3$ )

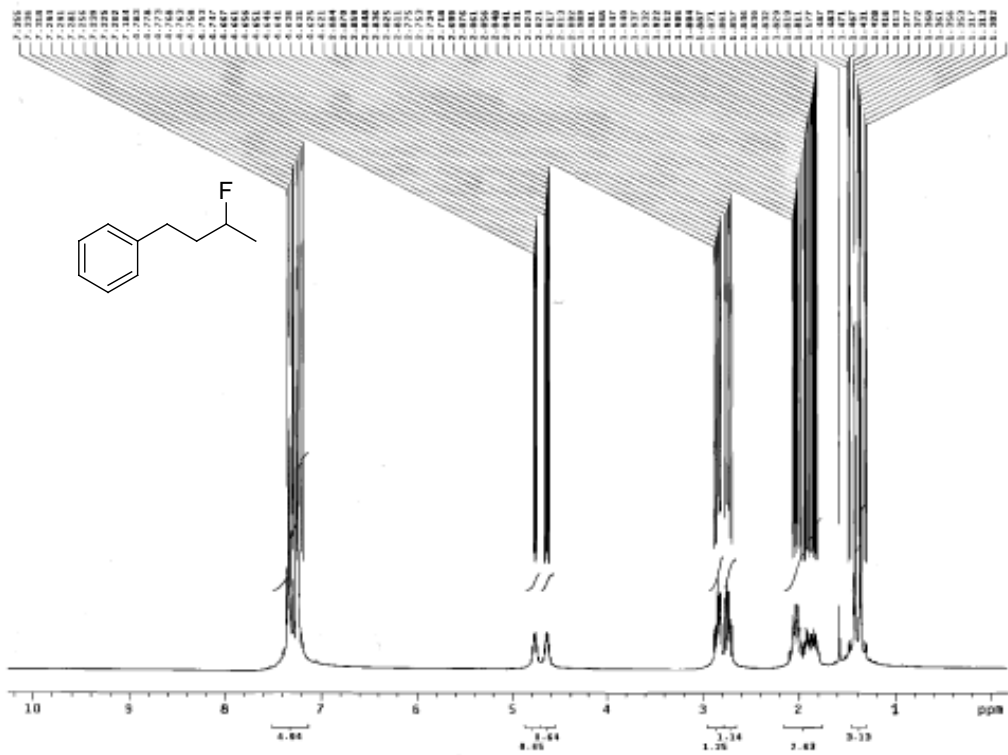

<sup>13</sup>C NMR (100 MHz, CDCl<sub>3</sub>)

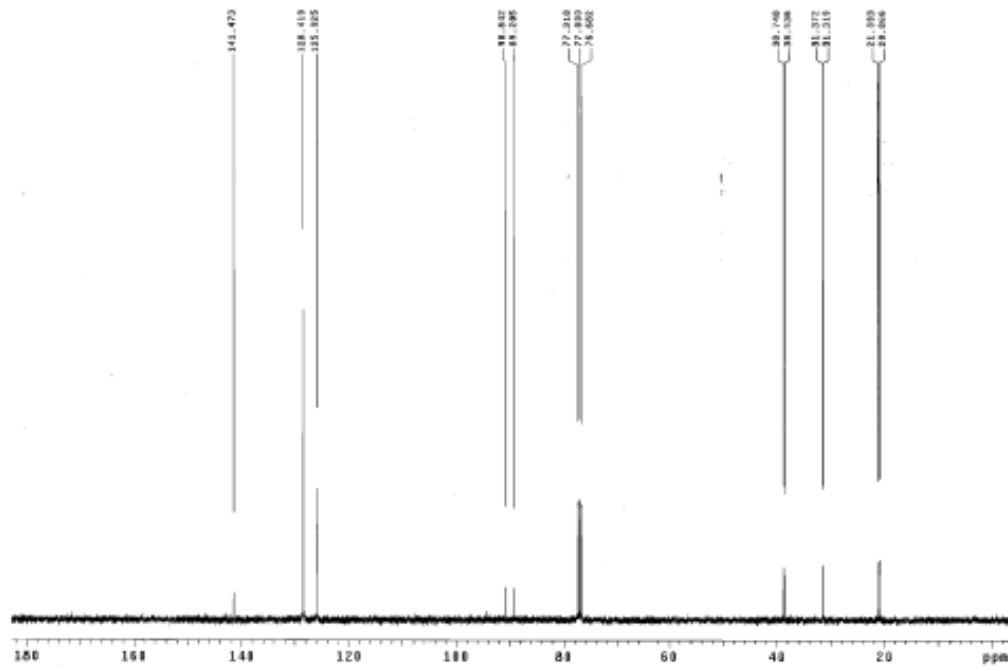

Supplement: c5nj00481k1.pdf [file c5nj00481k1.pdf]
